# Supplementary material for: Prevalence of self-reported food allergy in Tunisia: General trends and probabilistic modeling
Source: PubMed Central journal article supplement — World Allergy Organ J. 2023 Sep 28;16(9):100813. doi: 10.1016/j.waojou.2023.100813 (PMC10558849; doi:10.1016/j.waojou.2023.100813), 2023-09-28
Supplement: mmc1.pdf [file mmc1.pdf]

**Supplemental Appendices titles:**

**Supplemental appendix 1:** Questionnaire designed for the survey in French and in Arabic

**Supplemental appendix 2:** Cleaning data protocol

**Supplemental appendix 3:** List of fruits causing food allergies in the studied population

Cette enquête s'inscrit dans le cadre d'un projet National financé par le ministère de l'enseignement supérieur et de la recherche scientifique et dont l'objectif est d'étudier les allergies alimentaires et ses origines en Tunisie dans le but d'octroyer un meilleur conseil pour le consommateur.

Si vous souffrez, ou votre enfant, d'une allergie alimentaire ce projet vous concerne. Nous vous prions de remplir soigneusement le formulaire suivant, toutes les données recueillies sont protégées par la loi en vigueur.

## Questionnaire Je souffre d'une allergie alimentaire ?

### Informations personnelles :

Nom : ..... (facultatif)

Prénom ..... (facultatif)

Date et lieu de naissance : .....

Genre : Homme  Femme

**1. Es-tu allergique à un aliment ? Cochez le ou les aliment(s) allergène (s) :**

- Lait et produits laitiers
- Œufs
- Fruits sec
- Citer les.....
- Sésame
- Cacahuètes
- Fruits de mer. Citer le(s).....
- Poissons bleus
- Légumes. Citer le(s).....
- Fruits. Citer le(s).....
- Céréales. Citer le(s).....

Autre(s) aliment(s) ? Citez le(s) : .....

**2. Quels sont les symptômes que vous ressentez ? Cocher le ou les symptômes de votre allergie alimentaire :**

- Démangeaisons, enflure de la bouche pendant le repas.
- Rougeurs, papules, éruptions cutanées, démangeaisons.
- Yeux rougis et enflammés.
- Nez qui coule ou qui est bouché, des éternuements Forts.
- Essoufflement, asthme.
- Nausée
- Difficulté de digestion.
- Maux de tête.
- Comportement anormal (difficulté cognitive, mauvaise concentration...)

Autre(s) symptôme(s) ? Citez le(s).....

**4. Quand ces troubles ont-ils surgi pour la première fois ?**

A quel Age ?.....  
Quand ? (quelle année) ?.....

**5. Quand ces troubles surgissent-ils le plus souvent ?**

- Juste après le repas
- Après le repas d'une ou deux heures ; précisez.....
- Après la prise des médicaments
- Autres, précisez.....

**6. Avez-vous effectué un test pour identifier l'allergie alimentaire ?**

- Oui  Non
- Test cutané
- Test sérologique

Autre.....

**7. Prenez-vous un médicament contre votre ou vos allergies?**

- Oui  Non

Si oui, quel est le médicament ?

- PRIMALAN
- ALLERGICA

Autre médicament ? Citez le :.....

**8. Y-a-t-il un membre de votre famille qui souffre d'une allergie alimentaire ?**

- Oui  Non

Si oui, qui est-ce ?

- Les parents  fratrie  Oncle, tante ou cousins

**9. Il s'agit de la même allergie ?**

- Même allergie  Allergie différente ;

Citez:.....

**09. Souffrez-vous d'une autre allergie (autre qu'alimentaire) ?**

- |                          |                      |
|--------------------------|----------------------|
| <input type="checkbox"/> | Pollens              |
| <input type="checkbox"/> | Acarie               |
| <input type="checkbox"/> | Soleil               |
| <input type="checkbox"/> | Animaux : chats ...  |
| <input type="checkbox"/> | Insectes             |
| <input type="checkbox"/> | Produits cosmétiques |
| <input type="checkbox"/> | Médicaments          |
| <input type="checkbox"/> | Latex                |

**10. A quelle période de l'année ressentez-vous ces troubles de l'autre allergie ?**

- |                          |                                       |
|--------------------------|---------------------------------------|
| <input type="checkbox"/> | Toute l'année                         |
| <input type="checkbox"/> | Une saison, un ou plusieurs mois..... |

**11. Avez-vous des animaux domestiques ?**

- Oui  Non

Si oui le(s)-quel(s) ?

- |                          |       |                          |       |
|--------------------------|-------|--------------------------|-------|
| <input type="checkbox"/> | Chien | <input type="checkbox"/> | Lapin |
| <input type="checkbox"/> | Chat  | <input type="checkbox"/> | Poule |

Autre animal ?.....

**Questions diverses**

**14. Vous vous sentez bien informé sur les allergies ?**

- Oui  Non

**15. Repérez-vous facilement les allergènes sur les étiquettes des produits alimentaires ?**

- Oui  Non

**L'équipe de recherche vous remercie pour votre aimable coopération**

## استبيان طفلي يعاني من الحساسية الغذائية

### المعطيات الشخصية

الإسم : ..... (اختياري)

اللقب : ..... (اختياري)

السن (بالأعوام) : .....

الجنس :  أنثى  ذكر

الهاتف الجوال (اختياري) \_\_\_\_\_  
البريد الإلكتروني (اختياري) \_\_\_\_\_

يأتي هذا الاستبيان في إطار القيام بمشروع بحث وطني عدد  
PRF2017D3P1-PARADIS حول الحساسية الغذائية. هذا  
المشروع ممول من وزارة التعليم العالي والبحث العلمي وتحت  
إشراف الوكالة الوطنية للنهوض بالبحث العلمي ومرخص من  
قبل المندوبية الجهوية للتعليم بصفاقس.

إذا كان طفلك يشتهي من حساسية غذائية كن أحد المتطوعين  
لتشارك في هذا الاستبيان مع ضمان حماية معطياتك الشخصية  
حسب ما يقتضيه القانون.

2. ماهي أعراض الحساسية الغذائية التي تشعر بها؟ ضع علامة (×) أمام الخانة أو الخانات المناسبة:

|                                                                |                          |
|----------------------------------------------------------------|--------------------------|
| طفح جلدي وانتفاخ على مستوى الفم عند الاكل                      | <input type="checkbox"/> |
| حكاك في الجلد، طفح جلدي واحمرار                                | <input type="checkbox"/> |
| تورم واحمرار في العينين                                        | <input type="checkbox"/> |
| تهيج وانتفاخ في المسالك الهوائية التنفسية، احتقان وسيلان الأنف | <input type="checkbox"/> |
| ضيق التنفس الحاد، ربو                                          | <input type="checkbox"/> |
| غثيان                                                          | <input type="checkbox"/> |
| عسر في الهضم                                                   | <input type="checkbox"/> |
| آلام في الرأس (صداع، دوخة...)                                  | <input type="checkbox"/> |
| سلوك غير طبيعي: نقص في التركيز، صعوبات في الإدراك              | <input type="checkbox"/> |

أعراض أخرى، أذكرها:

.....  
.....

1. هل لديك حساسية لأي مواد غذائية معينة؟ ضع علامة (×) أمام الخانة أو الخانات المناسبة:

الحليب ومشتقاته  غلال البحر. أذكرها:

البيض  السمك الأزرق

الفواكه الجافة (اللوز، الجوز...)  الخضر. أذكرها:

أذكرها:.....

الجلجلان  الغلال. أذكرها:

.....

الكاكوية  الحبوب (قمح، شعير، ذرة...)

أذكرها:.....

مواد أخرى، أذكرها:

.....  
.....

7. هل تتناول دواء ضد الحساسية؟ ضع علامة (x) أمام الخانة المناسبة:

لا  نعم

هل هو؟

ALLERGICA  PRIMALAN

دواء آخر، أذكره: .....

8. هل يشكو أحد أفراد العائلة من الحساسية الغذائية؟

لا  نعم

إذا كانت أجابتك نعم، ضع علامة أمام صلة القرابة:

الوالدين  الأخوة  العم(ة) أو الخال(ة) أو أبنائهم

هل هي:

نفس نوع الحساسية  حساسية مختلفة. أذكرها:

.....

4. متى برزت هذه الأعراض لأول مرة؟

العمر عند ظهور الأعراض: .....

سنة ظهور الأعراض: .....

5. متى وأين تبرز غالباً هذه الأعراض؟ ضع علامة (x) أمام الخانة أو الخانات المناسبة:

|                                               |                          |
|-----------------------------------------------|--------------------------|
| بعد الأكل مباشرة                              | <input type="checkbox"/> |
| بعد الأكل بساعة أو ساعتين. أذكر الفترة: ..... | <input type="checkbox"/> |
| بعد تناول الأدوية                             | <input type="checkbox"/> |

حالة أخرى

أذكرها: .....

6. هل قمت بفحص طبي لتشخيص الحساسية الغذائية؟ ضع علامة (x) أمام الخانة أو الخانات المناسبة:

|                             |                              |                                   |
|-----------------------------|------------------------------|-----------------------------------|
| لا <input type="checkbox"/> | نعم <input type="checkbox"/> | فحص جلدي <input type="checkbox"/> |
|                             |                              | فحص دم <input type="checkbox"/>   |

فحص اخر، أذكره: .....



11. هل لديك حيوان أليف في المنزل؟ ضع علامة (x) أمام الخانة المناسبة:

لا  نعم

ما هو؟

قط  أرنب   
كلب  دجاج

حيوان آخر، أذكره: .....

أسئلة عامة

14. هل أنت على دراية جيدة بأمراض الحساسية عموماً؟ ضع علامة (x) أمام الخانة المناسبة:

لا  نعم

15. هل تستطيع تحديد المكونات المتسببة في الحساسية Allergènes Alimentaires بسهولة على أغلفة المواد الغذائية؟

لا  نعم

فريق البحث يقدم لكم كل الشكر والامتنان  
على حسن تعاونكم

حساسية أخرى

9. هل لديك نوع آخر من الحساسية؟ ضع علامة (x) أمام الخانة أو الخانات المناسبة:

|                               |                          |
|-------------------------------|--------------------------|
| غبار الطلع (الأزهار)          | <input type="checkbox"/> |
| الشمس                         | <input type="checkbox"/> |
| الحشرات                       | <input type="checkbox"/> |
| الأدوية                       | <input type="checkbox"/> |
| حشرة العُث المنزلي (acarions) | <input type="checkbox"/> |
| الحيوانات (القطط مثلاً)       | <input type="checkbox"/> |
| مواد التجميل                  | <input type="checkbox"/> |
| المطاط (اللاتكس)              | <input type="checkbox"/> |

10. في أي فترة من السنة تحصل لك أعراض هذه الحساسية الأخرى؟ ضع علامة (x) أمام الخانة المناسبة:

|                                  |                          |
|----------------------------------|--------------------------|
| كامل السنة                       | <input type="checkbox"/> |
| فصل أو أشهر محددة. أذكرها: ..... | <input type="checkbox"/> |
| .....                            | <input type="checkbox"/> |

## Supplemental Appendix 2: Cleaning data protocol

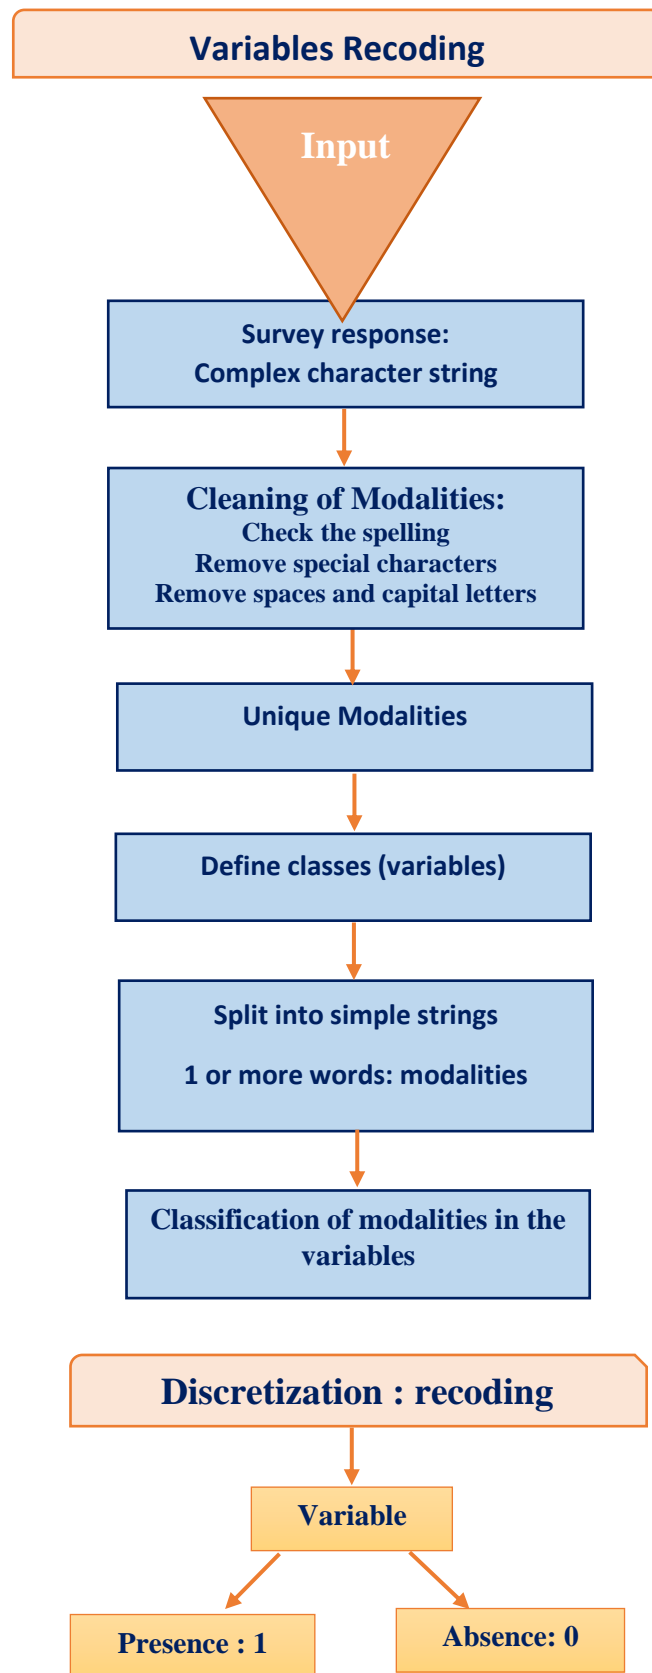

**Supplemental Appendix 2 caption:** Process of cleaning and discretization of the database of food allergies. This process is applied for multinomial variables: food allergens, symptoms, drugs, animal and, associated allergies to create binary variables.

**Supplemental Appendix 3: List of allergic fruits causing FA in the studied population.**

---

| <b>Fruits</b>                                    |
|--------------------------------------------------|
| Apple                                            |
| Apricot                                          |
| Banana                                           |
| Bergamot                                         |
| Blackberry                                       |
| Cherry                                           |
| Coconut                                          |
| Date                                             |
| Exotic fruits                                    |
| Fig                                              |
| Kiwi                                             |
| Long grain grapes (a specific variety of grapes) |
| Mango                                            |
| Melon                                            |
| Navel oranges                                    |
| Orange                                           |
| Peach                                            |
| Pear                                             |
| Pineapple                                        |
| Pomegranate                                      |
| Raspberry                                        |
| Strawberry                                       |
| Tomato                                           |
| Watermelon                                       |

---
